# Supplementary material
Source: Springer Nature journal article supplement (https://publikationen.ub.uni-frankfurt.de/opus4/files/6704/12862_2008_1065_MOESM1_ESM.pdf)
Supplement: MOESM1 [file 12862_2008_1065_MOESM1_ESM.pdf]

| Node | 10% prior probability distribution |             |              |             |              |              |              |             |             |             | 20% prior probability distribution |              |              |
|------|------------------------------------|-------------|--------------|-------------|--------------|--------------|--------------|-------------|-------------|-------------|------------------------------------|--------------|--------------|
|      | ULN                                | DM          | CPP          | MC          | ULN_1        | ULN_2        | ULN_3        | mtDNA       | nDNA        | BEAST       | ULN                                | DM           | CPP          |
| 1*   | 238.2 ± 10                         | 236.9 ± 8.1 | 238.0 ± 10.8 | 231.6 ± 3.1 | 250.6 ± 18.1 | 239.0 ± 10.4 | 237.2 ± 8.6  | 235.8 ± 7.5 | 237.9 ± 9.4 | 233.5 ± 5.5 | 244.4 ± 15.3                       | 246.2 ± 16.3 | 245.6 ± 16.0 |
| 2*   | 118 ± 4.5                          | 118.9 ± 5.2 | 117.8 ± 5.2  | 124.9 ± 7.2 | 229.0 ± 25.3 | 127.2 ± 11.9 | 132.7 ± 25.9 | 116.9 ± 4.2 | 118.7 ± 5.5 | 117.3 ± 3.6 | 127.4 ± 11.5                       | 128.5 ± 13.4 | 125.3 ± 9.7  |
| 3*   | 75.9 ± 7.4                         | 73.6 ± 6.2  | 73.5 ± 5.0   | 72.2 ± 4.5  | 187.2 ± 27.8 | 105.3 ± 13.3 | 77.2 ± 8.2   | 79.9 ± 9.9  | 71.5 ± 6.3  | 68.5 ± 3.9  | 88.7 ± 11.5                        | 89.4 ± 10.9  | 82.6 ± 8.1   |
| 4    | 58.3 ± 7.5                         | 56.1 ± 6.3  | 43.3 ± 5.7   | 49.7 ± 3.2  | 136.6 ± 26.7 | 77.6 ± 13.2  | 60.0 ± 7.3   | 60.7 ± 9.5  | 55.0 ± 6.3  | 47.9 ± 4.9  | 67.1 ± 9.7                         | 67.0 ± 9.3   | 51.8 ± 10.3  |
| 5    | 46.7 ± 6.1                         | 44.1 ± 5.3  | 27.2 ± 5.3   | 39.5 ± 2.3  | 106.2 ± 19.9 | 60.1 ± 11.0  | 48.0 ± 6.6   | 48.8 ± 8    | 42.5 ± 5.9  | 36.1 ± 3.9  | 52.5 ± 7.5                         | 52.0 ± 7.4   | 33.6 ± 8.4   |
| 6    | 43.2 ± 5.6                         | 40.6 ± 5.1  | 24.7 ± 4.9   | 37.9 ± 2.1  | 96.8 ± 17.7  | 55.7 ± 10.1  | 44.3 ± 6.3   | 50.2 ± 7.6  | 39.1 ± 5.3  | 33.2 ± 3.7  | 48.5 ± 7.2                         | 48.1 ± 6.5   | 30.4 ± 7.5   |
| 7    | 38.4 ± 5.1                         | 35.9 ± 4.4  | 21.6 ± 4.5   | 35.0 ± 2.1  | 85.0 ± 16.4  | 49.0 ± 9.2   | 39.5 ± 5.8   | 43.8 ± 7.3  | 33.9 ± 5    | 29.4 3.4    | 43.2 ± 6.3                         | 42.8 ± 5.8   | 26.8 ± 6.8   |
| 8    | 33.4 ± 5.2                         | 31.4 ± 4.4  | 19.5 ± 4.1   | 29.2 ± 2.1  | 73.7 ± 14.9  | 42.3 ± 7.6   | 34.2 ± 5.9   | 36.4 ± 6.7  | 27.1 ± 4.9  | 25.1 ± 3.6  | 37.7 ± 5.8                         | 37.0 ± 5.5   | 24.2 ± 6.0   |
| 9    | 18.5 ± 4.9                         | 16.6 ± 4.3  | 10.9 ± 2.5   | 15.7 ± 1.7  | 39.9 ± 12.3  | 24.3 ± 7.2   | 19.0 ± 5.5   | 19.8 ± 5.8  | 14.7 ± 4.5  | 13.9 ± 3.4  | 20.0 ± 5.6                         | 20.2 ± 5.1   | 13.5 ± 3.6   |
| 10   | 27.5 ± 5.2                         | 25.5 ± 4.7  | 17.0 ± 3.7   | 24.9 ± 2.1  | 59.7 ± 14.0  | 34.8 ± 7.4   | 27.8 ± 5.8   | 30.8 ± 6.9  | 25.9 ± 5.1  | 20.4 ± 3.5  | 30.8 ± 5.5                         | 30.3 ± 5.8   | 21.0 ± 5.4   |
| 11   | 35.1 ± 4.8                         | 32.7 ± 4.4  | 19.5 ± 4.0   | -           | 76.7 ± 15.6  | 44.5 ± 8.7   | 36.1 ± 5.6   | 42.5 ± 8.3  | 33.5 ± 5.1  | 26.9 ± 3.4  | 39.6 ± 6.3                         | 39.0 ± 5.7   | 24.0 ± 6.2   |
| 12   | 30.4 ± 4.7                         | 28.0 ± 3.9  | 17.1 ± 3.5   | 30.4 ± 2.0  | 65.0 ± 14.3  | 38.0 ± 7.6   | 31.2 ± 5.2   | 37.9 ± 8.7  | 27.3 ± 4.3  | 23.1 ± 3.3  | 34.2 ± 6.1                         | 33.8 ± 5.1   | 21.1 ± 5.6   |
| 13   | 22.0 ± 4.6                         | 20.9 ± 3.5  | 13.3 ± 2.8   | 24.6 ± 1.9  | 45.8 ± 12.5  | 27.7 ± 7.1   | 22.4 ± 4.9   | 26.2 ± 5.7  | 19.7 ± 4.1  | 16.8 ± 2.8  | 24.6 ± 5.4                         | 24.2 ± 4.8   | 16.4 ± 4.3   |
| 14   | 40.2 ± 5.1                         | 38.1 ± 5.1  | 22.8 ± 4.6   | 35.1 ± 2.1  | 89.7 ± 16.5  | 52.2 ± 9.3   | 41.4 ± 6.5   | 52.1 ± 7.8  | 33.7 ± 4.9  | 30.8 ± 3.6  | 45.6 ± 6.3                         | 45.2 ± 6.0   | 27.8 ± 7.1   |
| 15   | 31.4 ± 4.8                         | 29.7 ± 5.3  | 18.1 ± 3.9   | 31.0 ± 2.1  | 67.2 ± 15.4  | 40.3 ± 7.9   | 32.2 ± 5.7   | 43.0 ± 9.6  | 33.2 ± 5.1  | 24.4 ± 3.5  | 35.6 ± 6.1                         | 35.2 ± 6.1   | 21.9 ± 5.8   |
| 16   | 10.3 ± 2.9                         | 9.8 ± 3.0   | 4.9 ± 1.2    | 8.9 ± 1.1   | 23.2 ± 8.4   | 14.0 ± 5.2   | 10.4 ± 3.3   | 11.0 ± 3.4  | 9.2 ± 2.6   | 7.9 ± 1.9   | 11.7 ± 3.0                         | 10.9 ± 2.9   | 5.7 ± 1.6    |
| 17   | 17.4 ± 3.4                         | 15.5 ± 3.8  | 10.8 ± 2.2   | 14.6 ± 1.6  | 37.3 ± 10.5  | 21.6 ± 4.9   | 17.2 ± 3.8   | 25.2 ± 5.6  | 11.7 ± 3.5  | 13.8 ± 2.6  | 19.5 ± 4.5                         | 18.6 ± 4.8   | 13.8 ± 3.6   |
| 18   | 22.0 ± 3.3                         | 20.7 ± 4.0  | 15.1 ± 3.4   | 20.9 ± 1.6  | 48.8 ± 12.7  | 28.4 ± 6.4   | 22.8 ± 3.9   | 23.4 ± 4.3  | 19.9 ± 5.8  | 17.8 ± 2.6  | 25.7 ± 4.4                         | 24.6 ± 4.1   | 19.2 ± 4.7   |
| 19*  | 5.9 ± 0.6                          | 6.2 ± 0.8   | 6.0 ± 0.6    | 10.7 ± 1.0  | 5.9 ± 0.5    | 6.0 ± 0.6    | 5.9 ± 0.5    | 6.0 ± 0.6   | 5.7 ± 0.4   | 6.2 ± 0.6   | 8.4 ± 1.7                          | 8.5 ± 1.6    | 9.2 ± 1.6    |
| 20   | 16.1 ± 3.2                         | -           | -            | -           | 33.1 ± 10.4  | 19.7 ± 5.1   | 16.2 ± 3.5   | 22.2 ± 4.7  | 19.6 ± 6.2  | 12.9 ± 2.5  | 17.9 ± 4.5                         | -            | -            |
| 21   | 35.1 ± 5.6                         | 33.3 ± 6.0  | 21.1 ± 4.5   | 26.3 ± 1.9  | 77.9 ± 18.9  | 45.8 ± 9.7   | 38.8 ± 6.3   | 36.3 ± 6.9  | 23.2 ± 5.1  | 26.8 ± 3.5  | 39.3 ± 6.5                         | 38.9 ± 6.3   | 25.7 ± 6.7   |
| 22   | 19.7 ± 3.9                         | 18.9 ± 4.5  | 13.9 ± 2.9   | 18.1 ± 1.6  | 44.2 ± 14.1  | 25.3 ± 6.5   | 20.5 ± 4.7   | 21.6 ± 6.2  | 12.4 ± 3.2  | 15.8 ± 3.0  | 22.6 ± 5.2                         | 22.4 ± 5.1   | 17.2 ± 4.5   |
| 23   | 22.9 ± 6.7                         | 21.0 ± 6.3  | 20.7 ± 3.4   | 16.9 ± 2.0  | 50.4 ± 17.3  | 27.3 ± 11.0  | 23.0 ± 7.8   | 19.6 ± 5.6  | 22.9 ± 7.7  | 16.7 ± 4.5  | 25.4 ± 7.6                         | 22.1 ± 7.5   | 25.2 ± 7.3   |
| 24   | 32.3 ± 7.9                         | 29.0 ± 7.8  | 26.6 ± 4.4   | 22.3 ± 2.3  | 74.5 ± 24.0  | 39.2 ± 13.2  | 31.4 ± 8.7   | 27.3 ± 6.8  | 33.0 ± 8.1  | 23.0 ± 5.3  | 35.1 ± 9.1                         | 32.0 ± 9.8   | 32.8 ± 9.2   |
